# Supplementary material for: Trends in Online Search Activity and the Correlation with Daily New Cases of Monkeypox among 102 Countries or Territories
Source: MDPI journal article supplement (doi:10.3390/ijerph20043395), 2023-02-15
Supplement: s1 [file s1]

# Supplementary materials

This file formed part of the original submission.

|                                                                                                                       |   |
|-----------------------------------------------------------------------------------------------------------------------|---|
| Table S1 The value of $\beta_1$ , $\beta_2$ and $\beta_1+\beta_3$ among 194 countries or territories.....             | 1 |
| Figure S1 Time-lag correlations of global online search activity and daily new cases<br>.....                         | 6 |
| Table S2 Time-lag correlations of online search activity and daily new cases in 102<br>countries or territories ..... | 7 |

**Table S1. The value of  $\beta_1$ ,  $\beta_2$  and  $\beta_1+\beta_3$  among 194 countries or territories.**

| Country or territories | Before          |       | Change          |        | After           |        | $\beta_1+\beta_3$ value | Region        |
|------------------------|-----------------|-------|-----------------|--------|-----------------|--------|-------------------------|---------------|
|                        | $\beta_1$ value | P     | $\beta_2$ value | P      | $\beta_3$ value | P      |                         |               |
| World                  | -0.164          | 0.062 | 42.845          | <0.001 | -0.631          | <0.001 | -0.795                  |               |
| Afghanistan            | 0.119           | 0.204 | -0.928          | 0.885  | -0.248          | 0.073  | -0.128                  | Asia          |
| Albania                | 0.000           | 0.997 | 5.293           | 0.240  | -0.171          | 0.077  | -0.171                  | Europe        |
| Algeria                | -0.134          | 0.065 | 7.376           | 0.137  | 0.044           | 0.678  | -0.090                  | Africa        |
| American Samoa         | 0.133           | 0.188 | 3.889           | 0.576  | -0.316          | 0.035  | -0.182                  | Oceania       |
| Andorra                | -0.136          | 0.067 | 8.158           | 0.119  | 0.176           | 0.113  | 0.041                   | Europe        |
| Angola                 | -0.105          | 0.267 | 9.942           | 0.127  | -0.012          | 0.930  | -0.118                  | Africa        |
| Antigua & Barbuda      | 0.094           | 0.294 | 8.194           | 0.181  | -0.294          | 0.026  | -0.200                  | North America |
| Argentina              | -0.142          | 0.035 | 11.551          | 0.013  | -0.061          | 0.537  | -0.203                  | South America |
| Armenia                | -0.032          | 0.606 | 3.134           | 0.455  | 0.031           | 0.729  | 0.000                   | Asia          |
| Aruba                  | 0.037           | 0.679 | 0.669           | 0.914  | -0.150          | 0.261  | -0.112                  | North America |
| Australia              | -0.107          | 0.016 | 9.716           | 0.001  | -0.052          | 0.427  | -0.158                  | Oceania       |
| Austria                | -0.163          | 0.033 | 18.896          | <0.001 | -0.119          | 0.305  | -0.282                  | Europe        |
| Azerbaijan             | 0.013           | 0.872 | -0.647          | 0.907  | 0.008           | 0.948  | 0.021                   | Asia          |
| Bahamas                | 0.046           | 0.693 | 4.743           | 0.552  | -0.227          | 0.185  | -0.181                  | North America |
| Bahrain                | -0.089          | 0.322 | 12.120          | 0.051  | -0.057          | 0.667  | -0.147                  | Asia          |
| Bangladesh             | -0.176          | 0.004 | 6.289           | 0.132  | 0.051           | 0.571  | -0.125                  | Asia          |
| Barbados               | 0.171           | 0.030 | -12.054         | 0.025  | -0.192          | 0.094  | -0.021                  | North America |
| Belarus                | -0.050          | 0.408 | 7.677           | 0.065  | -0.065          | 0.461  | -0.115                  | Europe        |
| Belgium                | -0.174          | 0.024 | 18.813          | <0.001 | -0.164          | 0.151  | -0.337                  | Europe        |
| Belize                 | -0.071          | 0.309 | 11.247          | 0.019  | -0.083          | 0.414  | -0.154                  | North America |
| Benin                  | -0.022          | 0.739 | -0.230          | 0.959  | -0.035          | 0.717  | -0.057                  | Africa        |
| Bermuda                | 0.192           | 0.025 | -5.270          | 0.372  | -0.298          | 0.019  | -0.106                  | North America |
| Bhutan                 | -0.066          | 0.487 | 8.677           | 0.186  | -0.126          | 0.369  | -0.192                  | Asia          |
| Bolivia                | 0.162           | 0.073 | -7.573          | 0.222  | -0.194          | 0.157  | -0.032                  | South America |
| Bosnia and Herzegovina | 0.034           | 0.729 | 2.849           | 0.676  | -0.100          | 0.495  | -0.065                  | Europe        |
| Botswana               | 0.038           | 0.561 | -3.786          | 0.397  | -0.099          | 0.303  | -0.061                  | Africa        |
| Brazil                 | 0.127           | 0.024 | 50.611          | <0.001 | -0.917          | <0.001 | -0.790                  | South America |
| Brunei                 | -0.184          | 0.081 | 5.866           | 0.414  | 0.189           | 0.220  | 0.006                   | Asia          |
| Bulgaria               | -0.163          | 0.103 | 12.473          | 0.069  | -0.093          | 0.527  | -0.256                  | Europe        |
| Burkina Faso           | -0.113          | 0.266 | 2.993           | 0.667  | 0.171           | 0.252  | 0.058                   | Africa        |
| Burundi                | 0.021           | 0.691 | 0.316           | 0.931  | -0.013          | 0.871  | 0.009                   | Africa        |
| Cambodia               | -0.141          | 0.064 | 25.391          | <0.001 | -0.251          | 0.025  | -0.392                  | Asia          |
| Cameroon               | -0.060          | 0.559 | 0.208           | 0.976  | 0.120           | 0.424  | 0.060                   | Africa        |
| Canada                 | -0.166          | 0.011 | 14.849          | 0.001  | -0.138          | 0.162  | -0.304                  | North America |
| Cape Verde             | 0.009           | 0.883 | -2.961          | 0.458  | 0.024           | 0.782  | 0.032                   | Africa        |
| Chile                  | -0.015          | 0.873 | 13.244          | 0.046  | -0.206          | 0.149  | -0.221                  | South America |
| China                  | -0.060          | 0.539 | 4.415           | 0.511  | 0.019           | 0.894  | -0.041                  | Asia          |
| Colombia               | 0.019           | 0.837 | 31.487          | <0.001 | -0.628          | <0.001 | -0.609                  | South America |
| Congo                  | 0.114           | 0.175 | -8.036          | 0.161  | -0.101          | 0.412  | 0.013                   | Africa        |
| Costa Rica             | -0.228          | 0.015 | 22.076          | 0.001  | -0.072          | 0.597  | -0.300                  | North America |
| cote d'ivoire          | -0.115          | 0.182 | 4.992           | 0.397  | 0.061           | 0.630  | -0.054                  | Africa        |
| Croatia                | -0.156          | 0.016 | 12.509          | 0.005  | -0.052          | 0.582  | -0.209                  | Europe        |

|                              |        |        |         |        |        |        |        |               |
|------------------------------|--------|--------|---------|--------|--------|--------|--------|---------------|
| Cuba                         | 0.088  | 0.348  | 1.092   | 0.865  | -0.253 | 0.070  | -0.165 | North America |
| Curacao                      | -0.138 | 0.136  | 6.788   | 0.286  | 0.051  | 0.707  | -0.087 | North America |
| Cyprus                       | -0.237 | 0.003  | 11.194  | 0.040  | 0.133  | 0.247  | -0.104 | Europe        |
| Czechia                      | -0.165 | 0.060  | 10.970  | 0.071  | 0.007  | 0.954  | -0.157 | Europe        |
| Democratic Republic of Congo | -0.077 | 0.239  | 7.858   | 0.080  | 0.032  | 0.738  | -0.046 | Africa        |
| Denmark                      | -0.230 | 0.002  | 12.958  | 0.010  | 0.045  | 0.689  | -0.185 | Europe        |
| Djibouti                     | 0.005  | 0.943  | 0.374   | 0.934  | 0.013  | 0.890  | 0.018  | Africa        |
| Dominica                     | 0.039  | 0.507  | -3.934  | 0.329  | -0.025 | 0.767  | 0.013  | North America |
| Dominican Republic           | -0.027 | 0.806  | 16.182  | 0.032  | -0.370 | 0.023  | -0.396 | North America |
| Ecuador                      | -0.143 | 0.149  | 10.901  | 0.110  | 0.017  | 0.906  | -0.126 | South America |
| Egypt                        | -0.162 | 0.016  | 12.979  | 0.005  | -0.019 | 0.844  | -0.181 | Africa        |
| El Salvador                  | -0.033 | 0.751  | -0.552  | 0.939  | 0.094  | 0.553  | 0.061  | North America |
| Equatorial Guinea            | -0.077 | 0.380  | 3.217   | 0.593  | 0.131  | 0.310  | 0.054  | Africa        |
| Estonia                      | -0.052 | 0.557  | 1.260   | 0.833  | 0.023  | 0.862  | -0.029 | Europe        |
| eSwatini                     | 0.154  | 0.029  | -14.275 | 0.003  | -0.104 | 0.311  | 0.049  | Africa        |
| Ethiopia                     | -0.166 | 0.086  | 17.032  | 0.011  | -0.051 | 0.720  | -0.217 | Africa        |
| Fiji                         | -0.007 | 0.931  | 0.877   | 0.875  | 0.026  | 0.826  | 0.019  | Oceania       |
| Finland                      | -0.238 | <0.001 | 15.749  | 0.001  | 0.020  | 0.838  | -0.218 | Europe        |
| France                       | -0.058 | 0.371  | 15.691  | <0.001 | -0.344 | <0.001 | -0.402 | Europe        |
| Gabon                        | 0.056  | 0.480  | -9.154  | 0.091  | 0.001  | 0.994  | 0.056  | Africa        |
| Georgia                      | -0.048 | 0.464  | 7.274   | 0.106  | -0.093 | 0.332  | -0.141 | Asia          |
| Germany                      | -0.137 | 0.102  | 14.991  | 0.003  | -0.200 | 0.114  | -0.337 | Europe        |
| Ghana                        | -0.080 | 0.259  | -0.057  | 0.991  | -0.054 | 0.601  | -0.134 | Africa        |
| Gibraltar                    | -0.013 | 0.883  | 6.023   | 0.321  | -0.067 | 0.603  | -0.081 | Europe        |
| Greece                       | -0.206 | 0.001  | 18.669  | <0.001 | -0.103 | 0.270  | -0.309 | Europe        |
| Greenland                    | -0.013 | 0.861  | 1.444   | 0.786  | -0.047 | 0.681  | -0.060 | North America |
| Grenada                      | -0.005 | 0.951  | 1.141   | 0.850  | -0.099 | 0.444  | -0.104 | North America |
| Guadeloupe                   | -0.044 | 0.547  | -3.817  | 0.453  | 0.290  | 0.008  | 0.246  | North America |
| Guam                         | -0.008 | 0.855  | 9.590   | 0.002  | -0.139 | 0.033  | -0.147 | Oceania       |
| Guatemala                    | -0.129 | 0.063  | 11.403  | 0.018  | 0.074  | 0.485  | -0.055 | North America |
| Guinea                       | 0.088  | 0.198  | -8.916  | 0.057  | -0.059 | 0.555  | 0.029  | Africa        |
| Guinea-Bissau                | -0.097 | 0.200  | 6.744   | 0.191  | -0.026 | 0.814  | -0.123 | Africa        |
| Guyana                       | -0.017 | 0.728  | 4.058   | 0.236  | -0.012 | 0.873  | -0.029 | South America |
| Haiti                        | -0.028 | 0.736  | 13.362  | 0.018  | -0.134 | 0.266  | -0.162 | North America |
| Honduras                     | -0.092 | 0.384  | 4.466   | 0.541  | 0.026  | 0.869  | -0.067 | North America |
| Hungary                      | -0.122 | 0.163  | 12.040  | 0.041  | -0.104 | 0.423  | -0.226 | Europe        |
| Iceland                      | 0.026  | 0.790  | 7.085   | 0.286  | -0.169 | 0.231  | -0.144 | Europe        |
| India                        | -0.038 | 0.438  | 18.183  | <0.001 | -0.334 | <0.001 | -0.372 | Asia          |
| Indonesia                    | -0.096 | 0.173  | 40.298  | <0.001 | -0.503 | <0.001 | -0.599 | Asia          |
| Iran                         | -0.168 | 0.021  | 9.495   | 0.057  | 0.061  | 0.563  | -0.107 | Asia          |
| Iraq                         | -0.131 | 0.053  | 2.761   | 0.550  | 0.079  | 0.424  | -0.052 | Asia          |
| Ireland                      | -0.274 | <0.001 | 12.744  | 0.006  | 0.086  | 0.385  | -0.188 | Europe        |
| Israel                       | -0.185 | 0.009  | 15.980  | 0.001  | -0.011 | 0.918  | -0.196 | Asia          |
| Italy                        | -0.149 | 0.065  | 32.083  | <0.001 | -0.443 | <0.001 | -0.591 | Europe        |
| Jamaica                      | 0.051  | 0.463  | 1.413   | 0.769  | -0.257 | 0.013  | -0.205 | North America |
| Japan                        | -0.092 | 0.172  | 24.785  | <0.001 | -0.424 | <0.001 | -0.516 | Asia          |

|                          |        |        |         |        |        |        |        |               |
|--------------------------|--------|--------|---------|--------|--------|--------|--------|---------------|
| Jordan                   | -0.212 | 0.005  | 7.544   | 0.141  | 0.125  | 0.254  | -0.086 | Asia          |
| Kazakhstan               | -0.004 | 0.964  | 0.067   | 0.990  | 0.081  | 0.474  | 0.078  | Asia          |
| Kenya                    | -0.259 | <0.001 | 9.288   | 0.058  | 0.107  | 0.306  | -0.152 | Africa        |
| Kuwait                   | -0.139 | 0.133  | 13.901  | 0.029  | -0.123 | 0.365  | -0.262 | Asia          |
| Kyrgyzstan               | 0.082  | 0.301  | -7.020  | 0.197  | -0.059 | 0.611  | 0.023  | Asia          |
| Laos                     | -0.058 | 0.584  | 8.459   | 0.242  | 0.024  | 0.878  | -0.034 | Asia          |
| Latvia                   | 0.114  | 0.166  | -10.395 | 0.066  | -0.166 | 0.168  | -0.052 | Europe        |
| Lebanon                  | -0.164 | 0.006  | 4.678   | 0.242  | 0.092  | 0.281  | -0.072 | Asia          |
| Lesotho                  | 0.019  | 0.800  | 5.931   | 0.252  | -0.177 | 0.111  | -0.158 | Africa        |
| Liberia                  | -0.050 | 0.656  | 9.925   | 0.202  | -0.104 | 0.531  | -0.153 | Africa        |
| Libya                    | 0.039  | 0.674  | -4.225  | 0.505  | -0.022 | 0.871  | 0.017  | Africa        |
| Lithuania                | -0.107 | 0.200  | 10.865  | 0.063  | -0.180 | 0.146  | -0.287 | Europe        |
| Luxembourg               | 0.108  | 0.082  | -5.085  | 0.233  | -0.112 | 0.240  | -0.005 | Europe        |
| Madagascar               | -0.127 | 0.006  | 3.215   | 0.305  | 0.123  | 0.069  | -0.004 | Africa        |
| Malawi                   | 0.050  | 0.643  | -6.272  | 0.400  | 0.013  | 0.933  | 0.064  | Africa        |
| Malaysia                 | -0.183 | 0.017  | 15.298  | 0.004  | -0.166 | 0.139  | -0.348 | Asia          |
| Maldives                 | -0.004 | 0.968  | 3.211   | 0.604  | -0.139 | 0.294  | -0.143 | Asia          |
| Mali                     | 0.018  | 0.862  | 2.774   | 0.692  | -0.018 | 0.907  | <0.001 | Africa        |
| Malta                    | -0.089 | 0.102  | 2.152   | 0.560  | 0.090  | 0.262  | 0.001  | Europe        |
| Martinique               | -0.009 | 0.926  | 3.915   | 0.533  | -0.089 | 0.508  | -0.097 | North America |
| Mauritania               | 0.027  | 0.618  | -7.119  | 0.054  | 0.130  | 0.098  | 0.157  | Africa        |
| Mauritius                | -0.243 | 0.020  | 11.259  | 0.113  | 0.089  | 0.559  | -0.154 | Africa        |
| Mexico                   | -0.157 | 0.017  | 38.690  | <0.001 | -0.485 | <0.001 | -0.642 | North America |
| Moldova                  | -0.068 | 0.391  | 4.281   | 0.436  | 0.058  | 0.620  | -0.010 | Europe        |
| Mongolia                 | -0.033 | 0.689  | 6.501   | 0.254  | -0.049 | 0.687  | -0.082 | Asia          |
| Montenegro               | -0.033 | 0.724  | 2.356   | 0.716  | -0.023 | 0.867  | -0.056 | Europe        |
| Morocco                  | -0.217 | 0.001  | 9.474   | 0.027  | 0.112  | 0.220  | -0.105 | Africa        |
| Mozambique               | 0.011  | 0.896  | 1.811   | 0.744  | -0.127 | 0.285  | -0.117 | Africa        |
| Myanmar                  | -0.166 | 0.067  | 12.513  | 0.044  | -0.073 | 0.579  | -0.239 | Asia          |
| Namibia                  | 0.059  | 0.510  | 0.218   | 0.972  | -0.195 | 0.140  | -0.136 | Africa        |
| Nepal                    | -0.097 | 0.184  | 11.645  | 0.021  | -0.183 | 0.089  | -0.280 | Asia          |
| Netherlands              | -0.124 | 0.047  | 12.158  | 0.003  | -0.125 | 0.180  | -0.249 | Europe        |
| New Caledonia            | -0.055 | 0.513  | 0.625   | 0.913  | 0.046  | 0.706  | -0.009 | Oceania       |
| New Zealand              | -0.026 | 0.684  | 2.432   | 0.583  | -0.136 | 0.152  | -0.162 | Oceania       |
| Nicaragua                | 0.003  | 0.975  | -0.434  | 0.940  | -0.010 | 0.934  | -0.008 | North America |
| Niger                    | 0.094  | 0.228  | -3.741  | 0.483  | -0.059 | 0.605  | 0.035  | Africa        |
| Nigeria                  | -0.168 | 0.014  | 17.203  | <0.001 | -0.069 | 0.490  | -0.236 | Africa        |
| North Macedonia          | -0.237 | 0.004  | 8.017   | 0.151  | 0.174  | 0.147  | -0.064 | Europe        |
| Northern Mariana Islands | -0.020 | 0.824  | 4.682   | 0.458  | -0.147 | 0.278  | -0.167 | Oceania       |
| Norway                   | -0.172 | 0.028  | 15.826  | 0.002  | -0.158 | 0.171  | -0.330 | Europe        |
| Oman                     | -0.076 | 0.269  | 6.956   | 0.138  | -0.122 | 0.226  | -0.197 | Asia          |
| Pakistan                 | -0.139 | 0.009  | 3.911   | 0.283  | 0.077  | 0.321  | -0.062 | Asia          |
| Palau                    | 0.231  | 0.026  | -8.925  | 0.206  | -0.282 | 0.063  | -0.051 | Oceania       |
| Palestine                | -0.072 | 0.386  | -8.042  | 0.160  | 0.207  | 0.093  | 0.134  | Asia          |
| Panama                   | -0.130 | 0.141  | 10.635  | 0.081  | -0.022 | 0.863  | -0.153 | North America |
| Papua New Guinea         | 0.174  | 0.084  | -6.581  | 0.338  | -0.217 | 0.140  | -0.044 | Oceania       |
| Paraguay                 | 0.150  | 0.096  | 2.105   | 0.733  | -0.323 | 0.016  | -0.173 | South America |
| Peru                     | -0.175 | 0.042  | 18.814  | 0.002  | -0.059 | 0.637  | -0.234 | South America |
| Philippines              | -0.035 | 0.363  | 13.820  | <0.001 | -0.195 | 0.001  | -0.231 | Asia          |
| Poland                   | -0.217 | 0.004  | 19.757  | <0.001 | -0.125 | 0.257  | -0.342 | Europe        |
| Portugal                 | -0.186 | 0.004  | 13.750  | 0.002  | -0.104 | 0.272  | -0.289 | Europe        |
| Puerto Rico              | 0.008  | 0.925  | 28.610  | <0.001 | -0.561 | <0.001 | -0.553 | North America |
| Qatar                    | -0.231 | 0.006  | 20.982  | <0.001 | -0.117 | 0.341  | -0.348 | Asia          |

|                                  |        |        |        |        |        |        |        |               |
|----------------------------------|--------|--------|--------|--------|--------|--------|--------|---------------|
| Romania                          | -0.151 | 0.015  | 12.087 | 0.004  | -0.073 | 0.425  | -0.224 | Europe        |
| Russia                           | -0.070 | 0.491  | 11.633 | 0.096  | -0.149 | 0.317  | -0.219 | Europe        |
| Rwanda                           | 0.003  | 0.976  | -2.414 | 0.687  | -0.060 | 0.642  | -0.057 | Africa        |
| Saint Kitts and Nevis            | 0.016  | 0.872  | -1.132 | 0.870  | 0.030  | 0.837  | 0.047  | North America |
| Saint Lucia                      | -0.061 | 0.352  | 9.820  | 0.029  | -0.140 | 0.147  | -0.200 | North America |
| Saint Vincent and the Grenadines | -0.022 | 0.676  | 2.389  | 0.503  | -0.036 | 0.632  | -0.058 | North America |
| Samoa                            | -0.010 | 0.911  | 8.954  | 0.133  | -0.167 | 0.190  | -0.177 | Oceania       |
| Saudi Arabia                     | -0.165 | 0.033  | 12.450 | 0.019  | -0.077 | 0.506  | -0.242 | Asia          |
| Senegal                          | 0.049  | 0.433  | -2.137 | 0.618  | -0.066 | 0.472  | -0.017 | Africa        |
| Serbia                           | -0.261 | 0.006  | 14.900 | 0.021  | 0.095  | 0.490  | -0.166 | Europe        |
| Seychelles                       | 0.156  | 0.047  | -4.505 | 0.401  | -0.139 | 0.227  | 0.017  | Africa        |
| Sierra Leone                     | -0.022 | 0.795  | -0.347 | 0.951  | 0.109  | 0.371  | 0.088  | Africa        |
| Singapore                        | -0.108 | 0.247  | 15.447 | 0.016  | -0.377 | 0.008  | -0.484 | Asia          |
| Slovakia                         | -0.179 | 0.117  | 13.147 | 0.096  | -0.054 | 0.750  | -0.234 | Europe        |
| Slovenia                         | -0.112 | 0.108  | 4.881  | 0.290  | 0.061  | 0.558  | -0.051 | Europe        |
| Solomon Islands                  | 0.028  | 0.743  | 2.150  | 0.709  | -0.046 | 0.711  | -0.018 | Oceania       |
| Somalia                          | -0.041 | 0.558  | 3.713  | 0.439  | -0.081 | 0.433  | -0.122 | Africa        |
| South Africa                     | 0.003  | 0.939  | -2.827 | 0.316  | -0.039 | 0.522  | -0.036 | Africa        |
| South Korea                      | 0.026  | 0.734  | 6.833  | 0.188  | -0.371 | 0.001  | -0.345 | Asia          |
| South Sudan                      | 0.056  | 0.524  | -6.235 | 0.305  | -0.088 | 0.501  | -0.031 | Africa        |
| Spain                            | -0.215 | 0.007  | 22.086 | <0.001 | -0.204 | 0.091  | -0.419 | Europe        |
| Sri Lanka                        | -0.048 | 0.367  | 20.637 | <0.001 | -0.323 | <0.001 | -0.371 | Asia          |
| Sudan                            | -0.183 | 0.039  | 1.890  | 0.754  | 0.142  | 0.274  | -0.040 | Africa        |
| Suriname                         | 0.032  | 0.584  | -4.129 | 0.305  | 0.039  | 0.654  | 0.071  | South America |
| Sweden                           | -0.223 | 0.002  | 16.490 | 0.001  | -0.038 | 0.718  | -0.261 | Europe        |
| Switzerland                      | -0.037 | 0.655  | 11.618 | 0.034  | -0.307 | 0.018  | -0.345 | Europe        |
| Syria                            | -0.027 | 0.660  | 2.030  | 0.624  | -0.029 | 0.744  | -0.056 | Asia          |
| Taiwan (provinces of China)      | -0.057 | 0.460  | 6.849  | 0.196  | -0.173 | 0.127  | -0.230 | Asia          |
| Tajikistan                       | 0.048  | 0.445  | -4.278 | 0.326  | -0.044 | 0.639  | 0.005  | Asia          |
| Tanzania                         | -0.094 | 0.295  | 5.840  | 0.343  | -0.016 | 0.903  | -0.110 | Africa        |
| Thailand                         | -0.113 | 0.241  | 28.867 | <0.001 | -0.518 | <0.001 | -0.631 | Asia          |
| The Gambia                       | -0.074 | 0.469  | 9.404  | 0.180  | -0.025 | 0.867  | -0.099 | Africa        |
| Timor-Leste                      | 0.040  | 0.550  | -2.247 | 0.626  | -0.048 | 0.630  | -0.007 | Asia          |
| Togo                             | -0.018 | 0.830  | -3.023 | 0.591  | 0.069  | 0.569  | 0.051  | Africa        |
| Tonga                            | 0.022  | 0.734  | 3.432  | 0.440  | -0.118 | 0.215  | -0.096 | Oceania       |
| Trinidad and Tobago              | -0.041 | 0.574  | 11.198 | 0.026  | -0.287 | 0.008  | -0.328 | North America |
| Tunisia                          | -0.151 | 0.088  | 5.631  | 0.353  | 0.068  | 0.600  | -0.083 | Africa        |
| Turkey                           | -0.149 | 0.012  | 10.644 | 0.009  | -0.057 | 0.509  | -0.206 | Asia          |
| Turkmenistan                     | -0.127 | 0.134  | 1.653  | 0.776  | 0.196  | 0.118  | 0.068  | Europe        |
| Uganda                           | 0.029  | 0.747  | 1.417  | 0.821  | -0.355 | 0.009  | -0.326 | Africa        |
| Ukraine                          | -0.100 | 0.219  | 6.460  | 0.249  | -0.047 | 0.700  | -0.147 | Europe        |
| United Arab Emirates             | -0.210 | 0.002  | 7.165  | 0.121  | 0.101  | 0.306  | -0.108 | Asia          |
| United Kingdom                   | -0.239 | <0.001 | 11.144 | 0.008  | 0.043  | 0.644  | -0.196 | Europe        |
| United States                    | -0.051 | 0.431  | 45.423 | <0.001 | -0.784 | <0.001 | -0.834 | North America |
| Uruguay                          | -0.122 | 0.233  | -1.839 | 0.793  | 0.179  | 0.236  | 0.057  | South America |
| Uzbekistan                       | -0.021 | 0.791  | 11.908 | 0.032  | -0.105 | 0.377  | -0.126 | Asia          |
| Vanuatu                          | -0.041 | 0.469  | 0.906  | 0.816  | 0.040  | 0.633  | -0.001 | Oceania       |
| Venezuela                        | -0.095 | 0.276  | 8.612  | 0.152  | <0.001 | 0.999  | -0.095 | South America |
| Vietnam                          | -0.052 | 0.532  | 22.790 | <0.001 | -0.440 | <0.001 | -0.492 | Asia          |
| Virgin Islands                   | -0.038 | 0.658  | -3.860 | 0.516  | 0.142  | 0.264  | 0.104  | North America |
| Yemen                            | 0.017  | 0.823  | 6.583  | 0.212  | -0.233 | 0.040  | -0.216 | Asia          |

|          |        |       |       |       |        |       |        |        |
|----------|--------|-------|-------|-------|--------|-------|--------|--------|
| Zambia   | -0.066 | 0.283 | 0.618 | 0.883 | -0.029 | 0.745 | -0.095 | Africa |
| Zimbabwe | 0.084  | 0.336 | 1.129 | 0.850 | -0.319 | 0.013 | -0.235 | Africa |

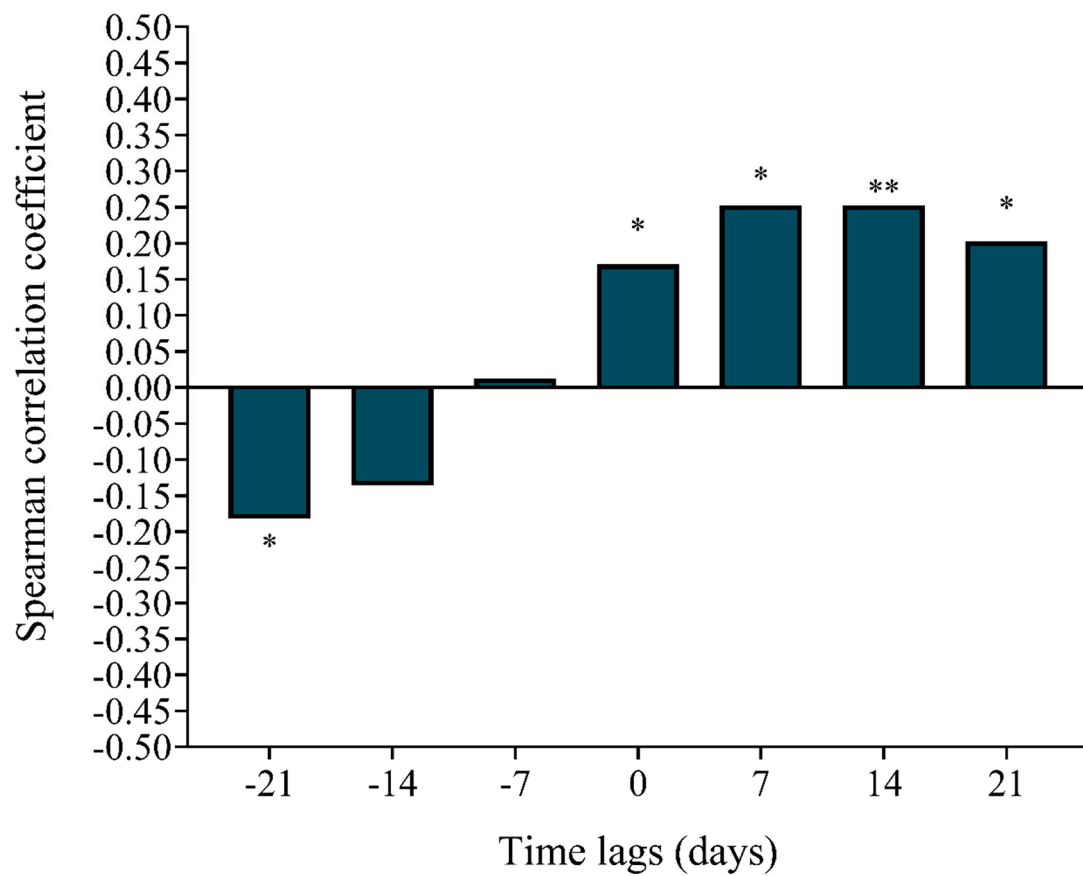

**Figure S1. Time-lag correlations of global online search activity and daily new cases.**

\* $P < 0.05$ ; \*\* $P < 0.001$ .

**Table S2. Time-lag correlations of online search activity and daily new cases in 102 countries or territories.**

| Countries or territories     | Lag -21 days | Lag -14 days | Lag -7 days | Lag 0 days | Lag 7 days | Lag 14 days | Lag 21 days |
|------------------------------|--------------|--------------|-------------|------------|------------|-------------|-------------|
| World                        | -0.182*      | -0.136       | 0.013       | 0.171*     | 0.253**    | 0.253**     | 0.202*      |
| Andorra                      | 0.085        | -0.058       | -0.057      | 0.071      | -0.057     | -0.060      | 0.066       |
| Argentina                    | 0.024        | -0.029       | -0.094      | -0.094     | 0.011      | -0.069      | -0.083      |
| Aruba                        | 0.076        | -0.067       | -0.064      | 0.063      | -0.064     | 0.047       | 0.062       |
| Australia                    | 0.065        | 0.036        | 0.013       | 0.123      | 0.095      | 0.086       | 0.058       |
| Austria                      | -0.076       | -0.037       | -0.043      | 0.025      | -0.001     | -0.014      | -0.064      |
| Bahamas                      | 0.030        | 0.027        | -0.084      | 0.009      | -0.083     | 0.005       | -0.087      |
| Bahrain                      | -0.056       | 0.167*       | -0.054      | 0.157*     | -0.054     | -0.055      | 0.173*      |
| Barbados                     | 0.131        | 0.137        | 0.069       | 0.115      | 0.077      | -0.053      | -0.055      |
| Belgium                      | -0.021       | -0.035       | 0.124       | 0.195*     | 0.070      | 0.059       | 0.103       |
| Benin                        | -0.037       | -0.036       | -0.035      | -0.034     | -0.034     | -0.035      | 0.189*      |
| Bermuda                      | 0.189*       | -0.044       | -0.042      | 0.162*     | 0.190*     | 0.184*      | -0.044      |
| Bolivia                      | 0.065        | 0.065        | 0.088       | 0.034      | 0.024      | 0.119       | 0.023       |
| Bosnia and Herzegovina       | -0.067       | -0.064       | -0.075      | 0.212**    | -0.085     | -0.085      | 0.001       |
| Brazil                       | 0.212*       | 0.213**      | 0.287***    | 0.350***   | 0.398***   | 0.426***    | 0.467***    |
| Bulgaria                     | -0.115       | -0.046       | 0.057       | 0.055      | -0.038     | -0.033      | 0.026       |
| Cameroon                     | 0.044        | 0.018        | -0.093      | 0.005      | -0.090     | -0.093      | -0.012      |
| Canada                       | -0.088       | -0.046       | 0.088       | 0.186*     | 0.206*     | 0.274***    | 0.220**     |
| Chile                        | 0.061        | 0.017        | -0.025      | 0.053      | -0.013     | 0.130       | 0.023       |
| China                        | -0.132       | -0.071       | -0.007      | -0.005     | -0.053     | -0.004      | 0.008       |
| Colombia                     | 0.014        | 0.075        | 0.005       | 0.152      | 0.215**    | 0.178*      | 0.114       |
| Congo                        | -0.063       | -0.063       | -0.060      | 0.055      | -0.058     | -0.060      | -0.049      |
| Costa Rica                   | -0.077       | 0.035        | 0.161*      | 0.081      | -0.010     | -0.021      | -0.023      |
| Croatia                      | -0.074       | 0.046        | -0.005      | -0.034     | -0.042     | -0.060      | 0.027       |
| Cuba                         | -0.049       | -0.047       | 0.066       | 0.041      | 0.045      | -0.068      | 0.060       |
| Curacao                      | 0.150        | 0.062        | -0.071      | -0.068     | 0.026      | 0.040       | -0.077      |
| Cyprus                       | 0.081        | -0.018       | -0.056      | 0.042      | 0.051      | 0.059       | 0.050       |
| Czechia                      | -0.013       | -0.040       | -0.165*     | 0.067      | 0.005      | -0.009      | -0.025      |
| Democratic Republic of Congo | -0.015       | -0.009       | 0.060       | -0.016     | -0.107     | 0.074       | 0.067       |
| Denmark                      | -0.047       | 0.007        | -0.017      | 0.057      | -0.031     | 0.003       | -0.147      |
| Dominican Republic           | -0.102       | -0.041       | -0.046      | 0.055      | 0.001      | 0.034       | -0.015      |
| Ecuador                      | -0.116       | 0.012        | -0.078      | -0.099     | 0.046      | -0.048      | 0.038       |
| El Salvador                  | 0.197*       | 0.010        | 0.132       | -0.111     | 0.138      | -0.024      | -0.021      |
| Estonia                      | -0.061       | -0.064       | 0.086       | -0.078     | 0.044      | -0.091      | 0.120       |
| Finland                      | -0.102       | -0.030       | -0.049      | 0.024      | -0.074     | -0.026      | 0.020       |
| France                       | -0.109       | -0.036       | -0.014      | 0.169*     | 0.125      | 0.044       | 0.024       |
| Georgia                      | -0.067       | -0.067       | -0.065      | 0.201*     | 0.048      | 0.255**     | 0.071       |
| Germany                      | -0.007       | -0.026       | -0.002      | 0.167*     | 0.087      | 0.043       | 0.011       |
| Ghana                        | -0.115       | 0.021        | -0.061      | 0.026      | -0.082     | -0.058      | -0.054      |
| Gibraltar                    | 0.118        | -0.078       | -0.076      | 0.037      | 0.013      | 0.044       | -0.079      |
| Greece                       | 0.117        | 0.024        | -0.014      | 0.051      | -0.118     | -0.043      | -0.085      |
| Greenland                    | 0.120        | -0.042       | -0.041      | -0.040     | -0.040     | -0.042      | 0.159       |
| Guadeloupe                   | -0.033       | -0.034       | -0.033      | -0.032     | -0.032     | -0.032      | -0.029      |



|               |         |         |        |          |         |        |        |
|---------------|---------|---------|--------|----------|---------|--------|--------|
| Guam          | -0.052  | -0.053  | -0.050 | 0.173*   | -0.048  | -0.050 | -0.051 |
| Guatemala     | 0.073   | 0.025   | 0.084  | 0.132    | 0.200*  | 0.196* | 0.098  |
| Guyana        | 0.072   | -0.073  | -0.070 | 0.078    | 0.209** | -0.072 | -0.073 |
| Honduras      | -0.024  | -0.014  | -0.046 | 0.062    | -0.106  | -0.038 | 0.120  |
| Hungary       | -0.185* | -0.084  | -0.139 | -0.032   | -0.020  | -0.069 | 0.146  |
| Iceland       | 0.140   | 0.156   | -0.011 | -0.015   | -0.021  | 0.021  | 0.203* |
| India         | 0.014   | 0.110   | 0.125  | 0.198*   | 0.130   | -0.009 | -0.017 |
| Indonesia     | -0.114  | 0.082   | 0.069  | 0.123    | 0.003   | 0.095  | 0.083  |
| Iran          | -0.066  | -0.066  | -0.062 | -0.060   | -0.062  | 0.087  | -0.068 |
| Ireland       | -0.101  | -0.092  | 0.056  | 0.087    | 0.120   | -0.071 | -0.051 |
| Israel        | 0.030   | 0.078   | -0.020 | 0.018    | -0.037  | -0.054 | -0.067 |
| Italy         | -0.032  | 0.030   | 0.093  | 0.158*   | 0.095   | 0.047  | 0.042  |
| Jamaica       | -0.077  | -0.165* | -0.095 | 0.101    | -0.056  | 0.059  | -0.015 |
| Japan         | -0.116  | 0.028   | 0.021  | 0.045    | -0.041  | 0.052  | -0.048 |
| Jordan        | -0.049  | -0.049  | 0.116  | -0.045   | -0.048  | -0.049 | 0.120  |
| Latvia        | 0.029   | -0.153  | -0.146 | 0.090    | 0.087   | 0.033  | 0.074  |
| Lebanon       | -0.073  | -0.128  | 0.006  | -0.057   | -0.012  | -0.011 | -0.093 |
| Liberia       | 0.060   | 0.053   | 0.045  | 0.048    | 0.045   | 0.025  | 0.053  |
| Lithuania     | 0.052   | -0.100  | -0.097 | 0.141    | 0.139   | 0.094  | -0.104 |
| Luxembourg    | 0.144   | -0.073  | 0.085  | -0.007   | 0.053   | -0.032 | 0.110  |
| Malta         | -0.145  | 0.033   | -0.027 | -0.140   | 0.096   | -0.087 | -0.031 |
| Martinique    | -0.039  | -0.040  | -0.038 | 0.146    | -0.040  | 0.133  | -0.044 |
| Mexico        | 0.157   | 0.038   | 0.023  | -0.017   | 0.041   | 0.067  | 0.091  |
| Moldova       | -0.061  | 0.077   | 0.080  | -0.058   | 0.249** | 0.077  | -0.061 |
| Montenegro    | -0.064  | 0.103   | -0.060 | 0.244**  | 0.088   | 0.177* | -0.064 |
| Morocco       | -0.073  | 0.028   | -0.072 | 0.212**  | 0.192*  | 0.185* | -0.080 |
| Netherlands   | 0.038   | 0.000   | 0.025  | 0.191*   | 0.078   | 0.069  | 0.059  |
| New Caledonia | -0.044  | -0.042  | -0.042 | -0.040   | -0.040  | -0.040 | -0.041 |
| New Zealand   | -0.026  | 0.082   | -0.074 | 0.074    | -0.021  | -0.033 | -0.027 |
| Nigeria       | -0.091  | 0.118   | -0.033 | 0.012    | 0.083   | -0.050 | 0.017  |
| Norway        | -0.095  | -0.079  | 0.000  | 0.023    | -0.001  | -0.040 | -0.022 |
| Panama        | -0.094  | -0.066  | -0.096 | -0.019   | -0.041  | 0.140  | -0.036 |
| Paraguay      | 0.163   | 0.131   | -0.068 | -0.064   | -0.066  | 0.205* | 0.200* |
| Peru          | 0.055   | 0.103   | 0.121  | 0.049    | 0.107   | 0.048  | 0.076  |
| Philippines   | 0.100   | 0.088   | 0.129  | 0.181*   | 0.031   | 0.116  | 0.035  |
| Poland        | -0.106  | 0.002   | -0.009 | -0.037   | -0.060  | 0.054  | 0.035  |
| Portugal      | -0.021  | 0.070   | 0.127  | 0.247**  | 0.175*  | 0.162* | 0.097  |
| Puerto Rico   | -0.041  | 0.023   | -0.035 | 0.070    | 0.013   | 0.077  | 0.130  |
| Qatar         | 0.133   | -0.013  | 0.021  | 0.131    | 0.105   | -0.066 | -0.151 |
| Romania       | -0.035  | -0.005  | -0.070 | -0.043   | 0.132   | 0.015  | -0.058 |
| Russia        | -0.085  | -0.085  | 0.062  | 0.149    | 0.039   | 0.067  | 0.005  |
| Saudi Arabia  | -0.009  | 0.052   | 0.080  | 0.145    | -0.001  | 0.112  | 0.156  |
| Serbia        | -0.031  | 0.016   | 0.023  | 0.014    | 0.062   | -0.076 | -0.032 |
| Singapore     | 0.029   | 0.068   | 0.127  | 0.276*** | 0.097   | 0.074  | 0.081  |
| Slovakia      | 0.010   | 0.009   | -0.034 | -0.086   | 0.065   | -0.036 | -0.068 |
| Slovenia      | -0.006  | -0.077  | -0.052 | 0.163*   | 0.171*  | 0.050  | 0.039  |
| South Africa  | -0.054  | 0.054   | 0.044  | 0.128    | -0.043  | 0.081  | 0.146  |
| South Korea   | -0.090  | 0.037   | -0.061 | 0.040    | -0.030  | 0.059  | 0.024  |
| Spain         | -0.118  | 0.030   | -0.010 | 0.144    | 0.044   | 0.128  | 0.101  |
| Sudan         | 0.103   | 0.042   | -0.029 | 0.048    | -0.013  | 0.008  | 0.121  |
| Sweden        | -0.127  | -0.054  | -0.041 | 0.035    | 0.043   | -0.024 | -0.104 |

|                      |        |        |         |          |          |          |         |
|----------------------|--------|--------|---------|----------|----------|----------|---------|
| Switzerland          | 0.090  | 0.079  | 0.096   | 0.244**  | 0.198*   | 0.163*   | 0.213*  |
| Thailand             | -0.039 | -0.005 | 0.029   | 0.051    | 0.069    | 0.061    | 0.022   |
| Turkey               | 0.037  | 0.054  | 0.071   | 0.035    | -0.046   | -0.028   | -0.060  |
| Ukraine              | -0.047 | -0.002 | -0.080  | 0.096    | -0.093   | 0.005    | -0.010  |
| United Arab Emirates | 0.043  | 0.081  | 0.219** | 0.226**  | 0.144    | 0.027    | -0.199* |
| United Kingdom       | 0.009  | 0.121  | 0.209** | 0.286*** | 0.314*** | 0.149    | 0.016   |
| United States        | -0.071 | 0.001  | 0.095   | 0.194*   | 0.232**  | 0.275*** | 0.207*  |
| Uruguay              | 0.097  | -0.010 | -0.001  | 0.033    | 0.043    | 0.038    | -0.026  |
| Venezuela            | 0.015  | -0.090 | -0.087  | 0.061    | -0.098   | 0.013    | -0.104  |

\*P<0.05; \*\*P<0.01; \*\*\*P<0.001
